## Correction

# Correction: A Scabies Mite Serpin Interferes with Complement-Mediated Neutrophil Functions and Promotes Staphylococcal Growth

**The *PLOS Neglected Tropical Diseases* Staff**

Figure 1B and Figure 4 are incorrect because they do not show the updated data. The authors have provided the corrected versions here.

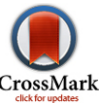

**Citation:** The *PLOS Neglected Tropical Diseases* Staff (2014) Correction: A Scabies Mite Serpin Interferes with Complement-Mediated Neutrophil Functions and Promotes Staphylococcal Growth. *PLoS Negl Trop Dis* 8(11): e3415. doi:10.1371/journal.pntd.0003415

**Published** November 25, 2014

**Copyright:** © 2014 The *PLOS Neglected Tropical Diseases* Staff. This is an open-access article distributed under the terms of the Creative Commons Attribution License, which permits unrestricted use, distribution, and reproduction in any medium, provided the original author and source are credited.

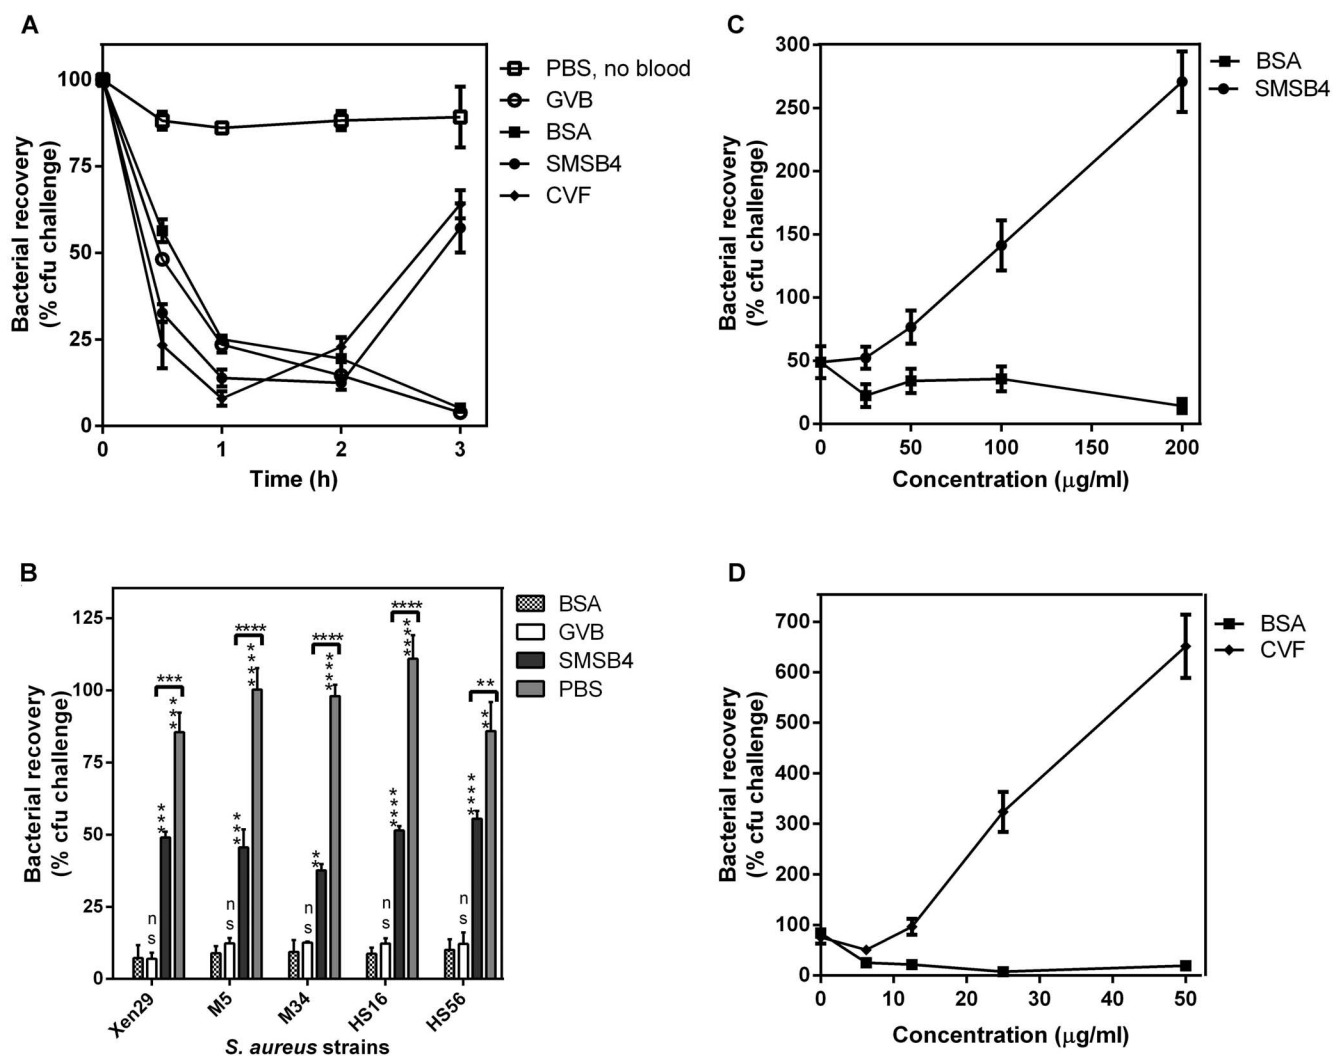

**Figure 1. SMSB4 reduces the blood killing of *S. aureus* strain Xen29 in whole blood (A) and pyoderma isolates of *S. aureus* (B).** SMSB4 promotes bacteria growth in a concentration dependent manner (C) similarly to CVF (D). *S. aureus* Xen29 or pyoderma isolates MRSA strains (HS16, M34), MSSA strains (HS56, M5) were harvested from mid-log growth phase culture. Bacteria ( $1 \times 10^5$  cfu/ml) were challenged with whole blood pre-treated with either 100  $\mu\text{g/ml}$  SMSB4, positive control 10  $\mu\text{g/ml}$  CVF, negative controls 100  $\mu\text{g/ml}$  BSA or GVB<sup>2+</sup> buffer only. *S. aureus* cells in PBS only without blood was also included to illustrate that the reduction in bacteria number was due to blood killing (A). Numbers of bacteria were counted as cfu/ml at various time points (A) or at 3 h (B, C, D). Bacterial recovery was calculated as a percentage of the challenge dose. Results are shown as means  $\pm$  SEM from three independent experiments. The statistical significance of differences between samples was estimated using two way ANOVA with Tukey's multiple comparison test. \*\*,  $p < 0.01$ ; \*\*\*,  $p < 0.001$ ; \*\*\*\*,  $p < 0.0001$ , ns, not significant (B). doi:10.1371/journal.pntd.0002928.g001

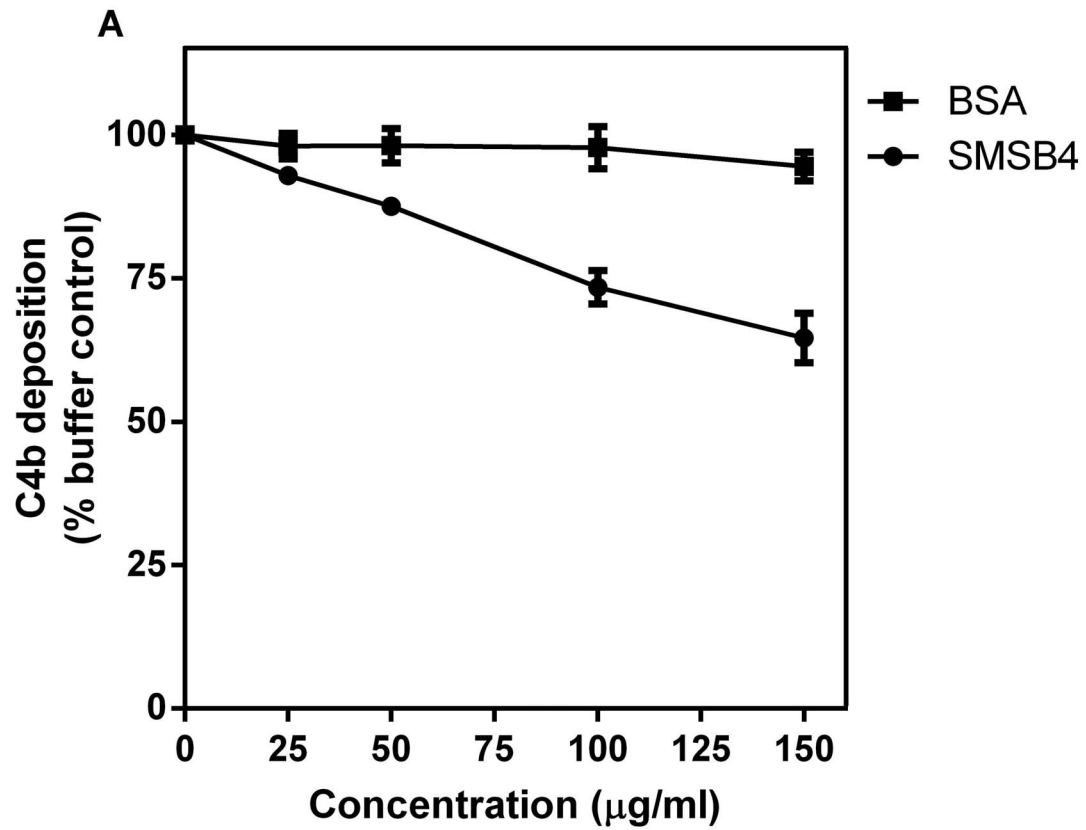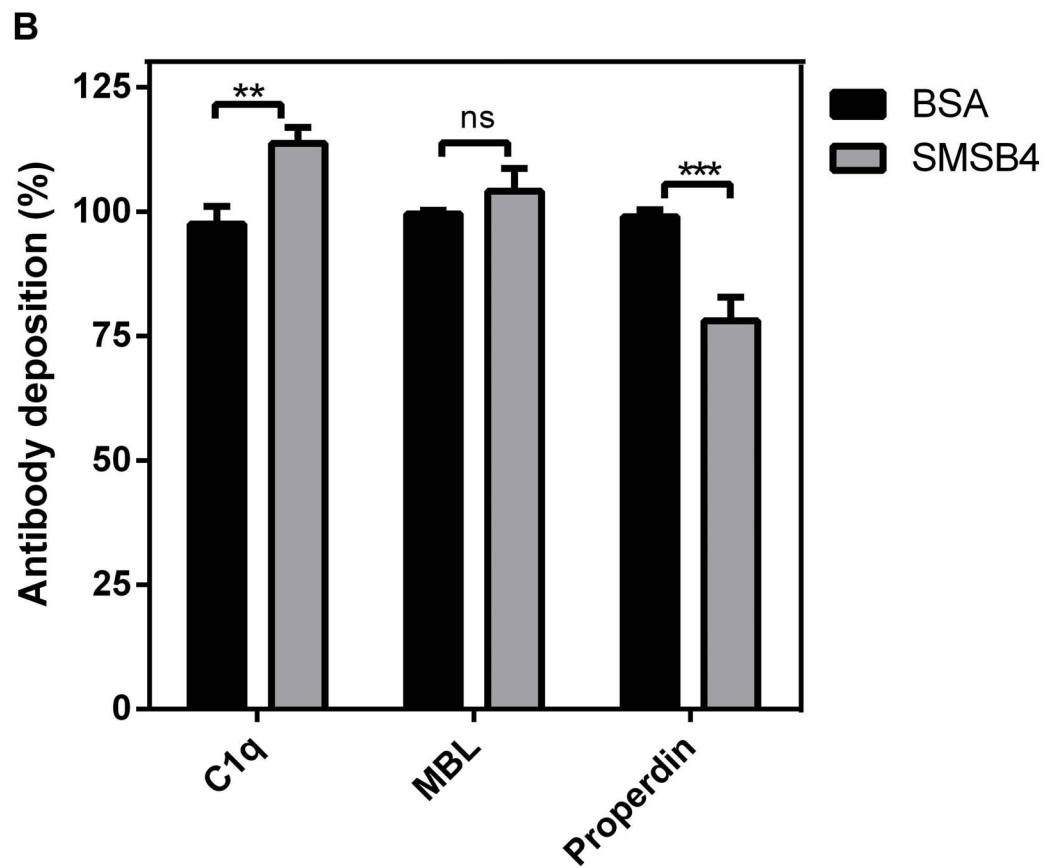

**Figure 4. Effect of SMSB4 on the depositions of C4b (A), C1q, MBL and properdin (B) on *S. aureus* cells.** The wells of 96-well microtiter plates were coated with 100  $\mu$ l aliquots of bacterial cell suspensions containing  $5 \times 10^6$  cfu/ml of *S. aureus*. Wells were then incubated with 10% NHS which has been pre-treated with increasing concentrations of either SMSB4 or BSA. Antibodies were detected by ELISA using primary human specific antibodies, followed by HRP-conjugated secondary antibodies, and fluorescence was detected at 490 nm. Results are shown as means  $\pm$  SEM from three independent experiments. The statistical significance of differences between BSA and SMSB4 treated samples were estimated using two way ANOVA with Sidak's multiple comparison test. \*\*,  $p < 0.01$ ; \*\*\*,  $p < 0.001$ ; ns, not significant (B).  
doi:10.1371/journal.pntd.0002928.g004

## Reference

1. Swe PM, Fischer K (2014) A Scabies Mite Serpin Interferes with Complement-Mediated Neutrophil Functions and Promotes Staphylococcal Growth. PLoS Negl Trop Dis 8(6): e2928. doi:10.1371/journal.pntd.0002928
